# Supplementary material for: Marioantofilliite, [Cu4Al2(OH)12](CO3) ⋅ 3H2O, a new member of the hydrotalcite supergroup from Liguria (Italy)
Source: Copernicus journal article supplement (doi:10.5194/ejm-37-733-2025), 2025-10-14
Supplement: Supplementary file [file ejm-37-733-2025-supplement-title-page.pdf › ejm-37-733-2025-supplement-title-page.pdf]

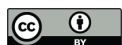

*Supplement of*

**Marioantofilliite,  $[\text{Cu}_4\text{Al}_2(\text{OH})_{12}](\text{CO}_3)\cdot 3\text{H}_2\text{O}$ , a new member of the hydrotalcite supergroup from Liguria (Italy)**

**Cristian Biagioni et al.**

*Correspondence to:* Cristian Biagioni ([cristian.biagioni@unipi.it](mailto:cristian.biagioni@unipi.it))

- [ejm-37-733-2025-supplement-title-page.pdf](#)
- [marioantofilliite.txt](#)
- [marioantofilliite\\_rev1.cif](#)

The copyright of individual parts of the supplement might differ from the article licence.
